# Supplementary material
Source: HighWire-hosted journal article supplement (https://jnnp.bmj.com/content/95/5/481)
Supplement: inline-supplementary-material-1 [file inline-supplementary-material-1.pdf]

**Supplementary Figure 1.** Flowchart for the selection of participants.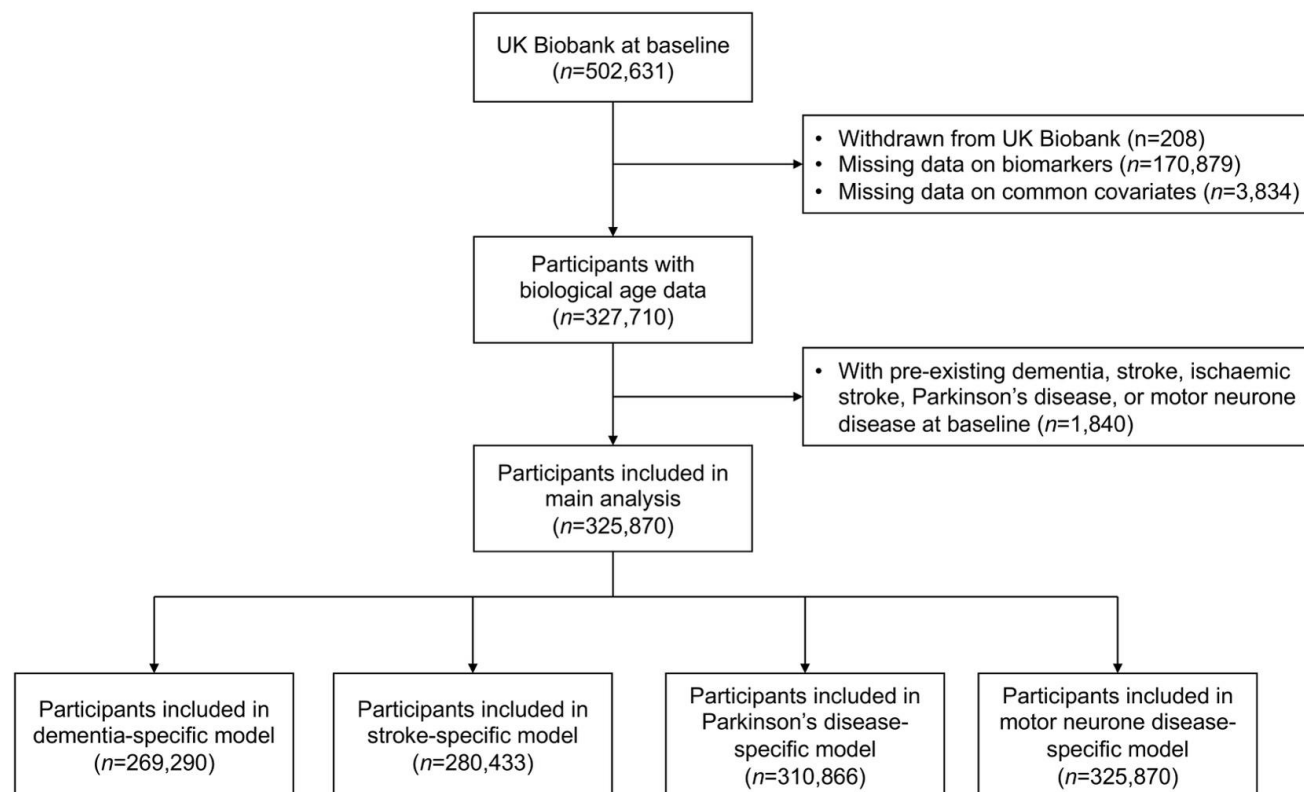

**Supplementary Figure 2.** Hazard ratios and 95% confidence intervals for neurological disorders in relation to 1-SD increase in biological age measures and the 18 individual clinical biomarkers.

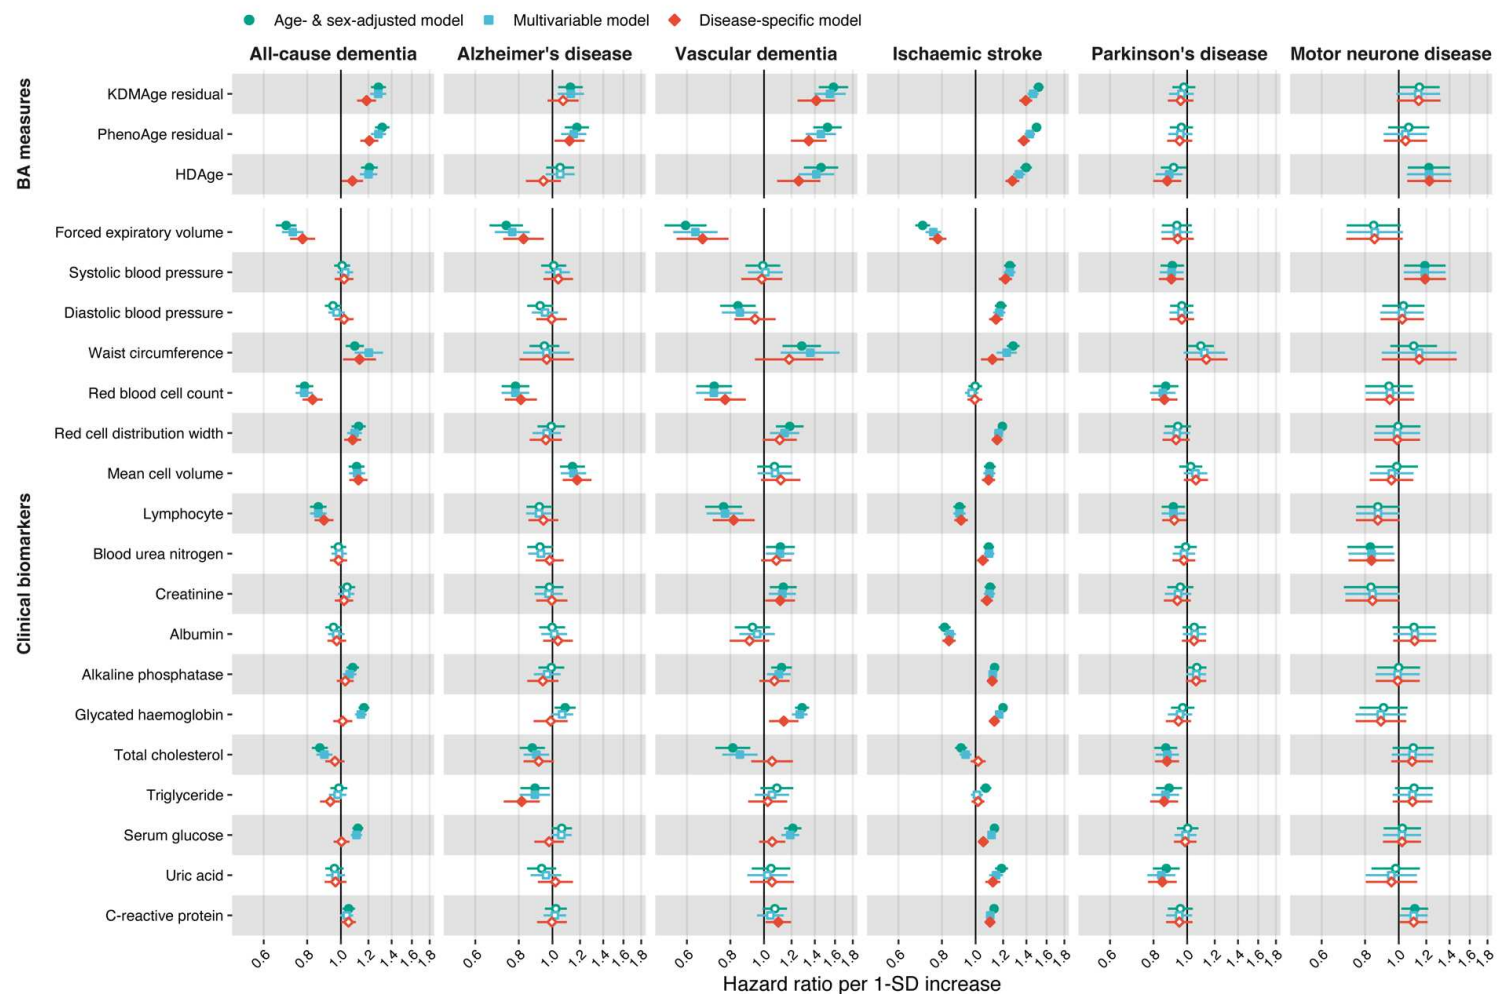

Filled symbols represent statistically significant associations a false discovery rate corrected significance level of 0.034. *HD*Age, homeostatic dysregulation age; *KDMA*ge, Klemera-Doublet method age; *SD*, standard deviation.

**Supplementary Table 1.** Definitions of the covariates included in the disease-specific models

| Covariate                               | Description                                                                                                                                                                                                                                                                                                                                                                             | Categorization                                                                                                                                                       | Field ID         | Dementia-specific model | Stroke-specific model | Parkinson's disease-specific model | Motor neurone disease-specific model |
|-----------------------------------------|-----------------------------------------------------------------------------------------------------------------------------------------------------------------------------------------------------------------------------------------------------------------------------------------------------------------------------------------------------------------------------------------|----------------------------------------------------------------------------------------------------------------------------------------------------------------------|------------------|-------------------------|-----------------------|------------------------------------|--------------------------------------|
| <b>Age (timescale)</b>                  | Date of baseline assessment minus date of birth                                                                                                                                                                                                                                                                                                                                         | Continuous                                                                                                                                                           | 53, 34, 52       | Yes                     | Yes                   | Yes                                | Yes                                  |
| <b>Year of birth</b>                    | Year of birth                                                                                                                                                                                                                                                                                                                                                                           | 1930–1939; 1940–1949; 1950–1959; ≥1960                                                                                                                               | 34               | Yes                     | Yes                   | Yes                                | Yes                                  |
| <b>Sex</b>                              | Self-reported sex or NHS-derived                                                                                                                                                                                                                                                                                                                                                        | Women; Men                                                                                                                                                           | 31               | Yes                     | Yes                   | Yes                                | Yes                                  |
| <b>Assessment centre</b>                | UK Biobank assessment centre                                                                                                                                                                                                                                                                                                                                                            | England; Wales; Scotland                                                                                                                                             | 54               | Yes                     | Yes                   | Yes                                | Yes                                  |
| <b>Ethnicity</b>                        | Self-reported ethnic background                                                                                                                                                                                                                                                                                                                                                         | White; Asian; Black; Others                                                                                                                                          | 21000            | Yes                     | Yes                   | Yes                                | Yes                                  |
| <b>Body mass index</b>                  | Body mass index calculated from measured height and weight                                                                                                                                                                                                                                                                                                                              | Underweight (<18.5); Normal weight (18.5 to <25); Overweight (25 to <30); Obese (≥30)                                                                                | 21001            | Yes                     | Yes                   | Yes                                | Yes                                  |
| <b>Smoking</b>                          | Self-reported smoking status                                                                                                                                                                                                                                                                                                                                                            | Never; Previous; Current                                                                                                                                             | 20116            | Yes                     | Yes                   | Yes                                | Yes                                  |
| <b>Alcohol</b>                          | Self-reported alcohol intake frequency                                                                                                                                                                                                                                                                                                                                                  | Less than 3 times a month; 1–4 times a week; Daily or almost daily                                                                                                   | 1558             | Yes                     | Yes                   | Yes                                | Yes                                  |
| <b>Deprivation</b>                      | Townsend deprivation index derived from national census data                                                                                                                                                                                                                                                                                                                            | Quintiles of deprivation index                                                                                                                                       | 22189            | Yes                     | Yes                   | Yes                                | Yes                                  |
| <b>Education</b>                        | Self-reported highest qualifications                                                                                                                                                                                                                                                                                                                                                    | Low (no relevant qualifications); Intermediate (A levels, O levels/GCSEs, CSEs, NVQ/HND/HNC, other professional qualifications); High (college or university degree) | 6138             | Yes                     | -                     | -                                  | -                                    |
| <b>Physical activity</b>                | Physical Activity Questionnaire activity group                                                                                                                                                                                                                                                                                                                                          | Low; Moderate; High                                                                                                                                                  | 22032            | Yes                     | Yes                   | -                                  | -                                    |
| <b>Social isolation</b>                 | Defined based on three questions: (1) “Including yourself, how many people are living together in your household?” (1 point if living alone); (2) “How often do you visit friends or family or have them visit you?” (1 point if less than once a month); (3) “Which of the following [leisure/social activities] do you engage in once a week or more often?” (1 point if no activity) | No (total score <2); Yes (total score ≥2)                                                                                                                            | 709, 1031, 6160  | Yes                     | -                     | -                                  | -                                    |
| <b>Air pollution</b>                    | Particulate matter air pollution (PM <sub>2.5</sub> )                                                                                                                                                                                                                                                                                                                                   | Continuous (µg/m <sup>3</sup> )                                                                                                                                      | 24006            | Yes                     | Yes                   | -                                  | -                                    |
| <b>Fresh vegetable and fruit intake</b> | Self-reported intake frequency of salad/raw vegetables and fresh fruits                                                                                                                                                                                                                                                                                                                 | <5 portions a day; ≥5 portions a day                                                                                                                                 | 1299, 1309       | -                       | Yes                   | -                                  | -                                    |
| <b>Red meat intake</b>                  | Self-reported intake frequency of beef, lamb, and pork                                                                                                                                                                                                                                                                                                                                  | Less than twice a week; Twice a week or more                                                                                                                         | 1369, 1379, 1389 | -                       | Yes                   | -                                  | -                                    |
| <b>Processed meat intake</b>            | Self-reported intake frequency of processed meat                                                                                                                                                                                                                                                                                                                                        | Less than twice a week; Twice a week or more                                                                                                                         | 1349             | -                       | Yes                   | -                                  | -                                    |
| <b>Diabetes</b>                         | Self-reported diabetes                                                                                                                                                                                                                                                                                                                                                                  | No; Yes                                                                                                                                                              | 2443, 20002      | Yes                     | Yes                   | -                                  | -                                    |
| <b>Hypertension</b>                     | Self-reported high blood pressure                                                                                                                                                                                                                                                                                                                                                       | No; Yes                                                                                                                                                              | 6150, 20002      | Yes                     | Yes                   | Yes                                | -                                    |
| <b>Depressive symptoms</b>              | Self-reported frequency of depressed mood in last 2 weeks                                                                                                                                                                                                                                                                                                                               | Not at all; Several days; More than half the days; Nearly every day                                                                                                  | 2050             | Yes                     | Yes                   | Yes                                | -                                    |

Supplementary Table 1. (continued)

| Covariate                                    | Description                                                                  | Categorization                                                | Field ID            | Dementia-specific model | Stroke-specific model | Parkinson's disease-specific model | Motor neurone disease-specific model |
|----------------------------------------------|------------------------------------------------------------------------------|---------------------------------------------------------------|---------------------|-------------------------|-----------------------|------------------------------------|--------------------------------------|
| <b>Hearing impairment</b>                    | Self-reported hearing difficulty/problems                                    | No; Yes                                                       | 2247                | Yes                     | -                     | -                                  | -                                    |
| <b>Traumatic brain injury</b>                | Self-reported head injury                                                    | No; Yes                                                       | 20002               | Yes                     | -                     | Yes                                | -                                    |
| <b>Dyslipidaemia</b>                         | Self-reported use of cholesterol lowering medication                         | No; Yes                                                       | 6153, 6177          | -                       | Yes                   | -                                  | -                                    |
| <b>Atrial fibrillation</b>                   | Self-reported atrial fibrillation                                            | No; Yes                                                       | 20002               | -                       | Yes                   | -                                  | -                                    |
| <b>ApoE e4 allele</b>                        | Determined based on two single nucleotide polymorphisms: rs7412 and rs429358 | None (e2e2, e2e3 or e3e3), One (e3e4 or e2e4), and Two (e4e4) | rs7412, rs429358    | Yes                     | -                     | -                                  | -                                    |
| <b>Family history of dementia</b>            | Self-reported illnesses in father, mother, or siblings                       | No; Yes                                                       | 20107, 20110, 20111 | Yes                     | -                     | -                                  | Yes                                  |
| <b>Family history of Parkinson's disease</b> | Self-reported illnesses in father, mother, or siblings                       | No; Yes                                                       | 20107, 20110, 20111 | -                       | -                     | Yes                                | -                                    |
| <b>Family history of stroke</b>              | Self-reported illnesses in father, mother, or siblings                       | No; Yes                                                       | 20107, 20110, 20111 | -                       | Yes                   | -                                  | -                                    |

**Supplementary Table 2.** Association between biological age measures and neurological disorders

| Model                                  | KDMAge residual             |                        | PhenoAge residual           |                        | HDAge                       |                       |
|----------------------------------------|-----------------------------|------------------------|-----------------------------|------------------------|-----------------------------|-----------------------|
|                                        | HR per SD increase (95% CI) | <i>p</i>               | HR per SD increase (95% CI) | <i>p</i>               | HR per SD increase (95% CI) | <i>p</i>              |
| <b>All-cause dementia</b>              |                             |                        |                             |                        |                             |                       |
| Age- & sex-adjusted model <sup>a</sup> | 1.28 (1.22, 1.35)*          | $1.0 \times 10^{-22}$  | 1.31 (1.25, 1.38)*          | $4.8 \times 10^{-29}$  | 1.21 (1.14, 1.28)*          | $3.1 \times 10^{-11}$ |
| Multivariable model <sup>b</sup>       | 1.28 (1.21, 1.35)*          | $4.1 \times 10^{-20}$  | 1.28 (1.22, 1.35)*          | $3.0 \times 10^{-22}$  | 1.20 (1.13, 1.27)*          | $6.0 \times 10^{-10}$ |
| Disease-specific model <sup>c</sup>    | 1.19 (1.11, 1.26)*          | $1.1 \times 10^{-7}$   | 1.21 (1.14, 1.28)*          | $6.9 \times 10^{-10}$  | 1.08 (1.01, 1.16)*          | 0.033                 |
| <b>Alzheimer's disease</b>             |                             |                        |                             |                        |                             |                       |
| Age- & sex-adjusted model <sup>a</sup> | 1.13 (1.04, 1.22)*          | 0.004                  | 1.18 (1.08, 1.27)*          | $7.8 \times 10^{-5}$   | 1.05 (0.96, 1.15)           | 0.281                 |
| Multivariable model <sup>b</sup>       | 1.13 (1.04, 1.23)*          | 0.006                  | 1.15 (1.06, 1.25)*          | 0.001                  | 1.05 (0.96, 1.16)           | 0.296                 |
| Disease-specific model <sup>c</sup>    | 1.07 (0.97, 1.19)           | 0.181                  | 1.12 (1.01, 1.24)*          | 0.026                  | 0.94 (0.84, 1.06)           | 0.312                 |
| <b>Vascular dementia</b>               |                             |                        |                             |                        |                             |                       |
| Age- & sex-adjusted model <sup>a</sup> | 1.58 (1.44, 1.75)*          | $2.0 \times 10^{-20}$  | 1.52 (1.39, 1.67)*          | $2.4 \times 10^{-18}$  | 1.46 (1.30, 1.63)*          | $7.6 \times 10^{-11}$ |
| Multivariable model <sup>b</sup>       | 1.55 (1.39, 1.72)*          | $1.8 \times 10^{-16}$  | 1.46 (1.32, 1.61)*          | $1.6 \times 10^{-13}$  | 1.41 (1.26, 1.59)*          | $9.0 \times 10^{-9}$  |
| Disease-specific model <sup>c</sup>    | 1.41 (1.25, 1.60)*          | $4.6 \times 10^{-8}$   | 1.34 (1.19, 1.51)*          | $1.1 \times 10^{-6}$   | 1.26 (1.09, 1.45)*          | 0.002                 |
| <b>Ischemic stroke</b>                 |                             |                        |                             |                        |                             |                       |
| Age- & sex-adjusted model <sup>a</sup> | 1.52 (1.47, 1.57)*          | $5.9 \times 10^{-127}$ | 1.50 (1.45, 1.55)*          | $1.5 \times 10^{-133}$ | 1.40 (1.35, 1.45)*          | $3.6 \times 10^{-66}$ |
| Multivariable model <sup>b</sup>       | 1.46 (1.41, 1.52)*          | $1.3 \times 10^{-89}$  | 1.43 (1.38, 1.48)*          | $2.1 \times 10^{-91}$  | 1.33 (1.28, 1.39)*          | $2.8 \times 10^{-44}$ |
| Disease-specific model <sup>c</sup>    | 1.39 (1.34, 1.46)*          | $3.4 \times 10^{-52}$  | 1.38 (1.32, 1.43)*          | $6.2 \times 10^{-55}$  | 1.28 (1.22, 1.34)*          | $4.4 \times 10^{-25}$ |
| <b>Parkinson's disease</b>             |                             |                        |                             |                        |                             |                       |
| Age- & sex-adjusted model <sup>a</sup> | 0.98 (0.91, 1.06)           | 0.575                  | 0.96 (0.89, 1.04)           | 0.329                  | 0.91 (0.84, 1.00)           | 0.038                 |
| Multivariable model <sup>b</sup>       | 0.96 (0.89, 1.04)           | 0.362                  | 0.96 (0.88, 1.04)           | 0.270                  | 0.89 (0.81, 0.97)*          | 0.009                 |
| Disease-specific model <sup>c</sup>    | 0.96 (0.88, 1.04)           | 0.318                  | 0.95 (0.88, 1.03)           | 0.242                  | 0.88 (0.80, 0.96)*          | 0.005                 |
| <b>Motor neurone disease</b>           |                             |                        |                             |                        |                             |                       |
| Age- & sex-adjusted model <sup>a</sup> | 1.15 (1.00, 1.31)           | 0.046                  | 1.07 (0.93, 1.22)           | 0.344                  | 1.22 (1.06, 1.40)*          | 0.005                 |
| Multivariable model <sup>b</sup>       | 1.14 (0.98, 1.32)           | 0.081                  | 1.04 (0.90, 1.21)           | 0.557                  | 1.22 (1.06, 1.42)*          | 0.007                 |
| Disease-specific model <sup>c</sup>    | 1.14 (0.99, 1.32)           | 0.074                  | 1.05 (0.91, 1.21)           | 0.541                  | 1.22 (1.06, 1.42)*          | 0.007                 |

CI, confidence interval; HDAge, homeostatic dysregulation age; HR, hazard ratio; KDMAge, Klemera-Doubal method age; SD, standard deviation.

<sup>a</sup> Age- & sex-adjusted models: adjusted for age (timescale), birthyear, and sex (n=325,870).

<sup>b</sup> Multivariable models: additionally adjusted for baseline assessment centre, ethnicity, body mass index, smoking, alcohol consumption, and deprivation (n=325,870).

<sup>c</sup> Disease-specific models further included covariates that are relevant for each outcome based on the literature (**Supplementary Table 1**). The models for all-cause dementia, Alzheimer's disease, and vascular dementia included education, physical activity, social isolation, air pollution, diabetes, hypertension, depressive symptoms, hearing impairment, traumatic brain injury, *ApoE* e4 allele, and family history of dementia (n=269,290). The models for ischaemic stroke included physical activity, air pollution, fresh vegetable and fruit intake, red meat intake, processed meat intake, diabetes, hypertension, depressive symptoms, dyslipidaemia, atrial fibrillation, and family history of stroke (n=280,433). The models for Parkinson's disease included hypertension, depressive symptoms, traumatic brain injury, and family history of Parkinson's disease (n=310,866). The models for motor neurone disease included family history of dementia (n=325,870).

\* Significant at a false discovery rate corrected significance level of 0.034

**Supplementary Table 3.** Subgroup analysis of the association between biological age measures and neurological disorders

| Subgroup                     | KDMAge residual             |                   | PhenoAge residual           |                   | HDAge                       |                   |
|------------------------------|-----------------------------|-------------------|-----------------------------|-------------------|-----------------------------|-------------------|
|                              | HR per SD increase (95% CI) | $P_{interaction}$ | HR per SD increase (95% CI) | $P_{interaction}$ | HR per SD increase (95% CI) | $P_{interaction}$ |
| <b>All-cause dementia</b>    |                             |                   |                             |                   |                             |                   |
| Age <60 (n=154,828)          | 1.32 (1.14, 1.54)           | 0.062             | 1.41 (1.23, 1.62)           | 0.005             | 1.13 (0.96, 1.32)           | 0.389             |
| Age ≥60 (n=114,462)          | 1.16 (1.08, 1.24)           |                   | 1.17 (1.09, 1.25)           |                   | 1.07 (0.99, 1.16)           |                   |
| Women (n=143,956)            | 1.17 (1.07, 1.29)           | 0.771             | 1.32 (1.21, 1.45)           | 0.029             | 1.21 (1.08, 1.35)           | 0.037             |
| Men (n=125,334)              | 1.19 (1.10, 1.30)           |                   | 1.13 (1.05, 1.22)           |                   | 1.00 (0.91, 1.10)           |                   |
| <b>Alzheimer's disease</b>   |                             |                   |                             |                   |                             |                   |
| Age <60 (n=154,828)          | 1.21 (0.92, 1.60)           | 0.489             | 1.42 (1.12, 1.80)           | 0.059             | 0.87 (0.64, 1.18)           | 0.443             |
| Age ≥60 (n=114,462)          | 1.05 (0.94, 1.18)           |                   | 1.08 (0.97, 1.20)           |                   | 0.95 (0.84, 1.08)           |                   |
| Women (n=143,956)            | 1.12 (0.96, 1.30)           | 0.442             | 1.30 (1.13, 1.50)           | 0.009             | 1.03 (0.86, 1.22)           | 0.128             |
| Men (n=125,334)              | 1.03 (0.89, 1.19)           |                   | 0.98 (0.85, 1.12)           |                   | 0.87 (0.74, 1.02)           |                   |
| <b>Vascular dementia</b>     |                             |                   |                             |                   |                             |                   |
| Age <60 (n=154,828)          | 1.96 (1.39, 2.76)           | 0.010             | 2.03 (1.47, 2.80)           | 0.002             | 1.50 (0.98, 2.31)           | 0.232             |
| Age ≥60 (n=114,462)          | 1.35 (1.18, 1.54)           |                   | 1.28 (1.13, 1.46)           |                   | 1.22 (1.05, 1.42)           |                   |
| Women (n=143,956)            | 1.28 (1.02, 1.61)           | 0.666             | 1.33 (1.08, 1.65)           | 0.611             | 1.29 (0.99, 1.67)           | 0.414             |
| Men (n=125,334)              | 1.50 (1.30, 1.74)           |                   | 1.35 (1.17, 1.56)           |                   | 1.22 (1.03, 1.45)           |                   |
| <b>Ischemic stroke</b>       |                             |                   |                             |                   |                             |                   |
| Age <60 (n=160,957)          | 1.37 (1.27, 1.49)           | 0.511             | 1.39 (1.29, 1.50)           | 0.125             | 1.28 (1.18, 1.39)           | 0.493             |
| Age ≥60 (n=119,476)          | 1.40 (1.33, 1.47)           |                   | 1.37 (1.31, 1.44)           |                   | 1.26 (1.19, 1.34)           |                   |
| Women (n=151,275)            | 1.30 (1.21, 1.40)           | 0.127             | 1.35 (1.26, 1.45)           | 0.911             | 1.35 (1.25, 1.47)           | 0.012             |
| Men (n=129,158)              | 1.46 (1.38, 1.54)           |                   | 1.40 (1.33, 1.47)           |                   | 1.23 (1.16, 1.30)           |                   |
| <b>Parkinson's disease</b>   |                             |                   |                             |                   |                             |                   |
| Age <60 (n=178,385)          | 0.87 (0.71, 1.07)           | 0.368             | 0.86 (0.70, 1.05)           | 0.343             | 0.78 (0.63, 0.97)           | 0.241             |
| Age ≥60 (n=132,481)          | 0.97 (0.89, 1.07)           |                   | 0.97 (0.89, 1.07)           |                   | 0.90 (0.81, 1.00)           |                   |
| Women (n=167,679)            | 0.99 (0.87, 1.13)           | 0.288             | 1.02 (0.90, 1.17)           | 0.090             | 0.99 (0.85, 1.15)           | 0.025             |
| Men (n=143,187)              | 0.94 (0.84, 1.04)           |                   | 0.91 (0.82, 1.01)           |                   | 0.81 (0.72, 0.92)           |                   |
| <b>Motor neurone disease</b> |                             |                   |                             |                   |                             |                   |
| Age <60 (n=187,275)          | 1.26 (1.00, 1.59)           | 0.133             | 1.18 (0.94, 1.48)           | 0.048             | 1.26 (1.00, 1.57)           | 0.577             |
| Age ≥60 (n=138,595)          | 1.06 (0.88, 1.28)           |                   | 0.96 (0.80, 1.16)           |                   | 1.19 (0.98, 1.44)           |                   |
| Women (n=176,631)            | 1.12 (0.89, 1.40)           | 0.801             | 1.03 (0.82, 1.30)           | 0.847             | 1.21 (0.96, 1.54)           | 0.969             |
| Men (n=149,239)              | 1.15 (0.95, 1.39)           |                   | 1.05 (0.87, 1.26)           |                   | 1.23 (1.02, 1.48)           |                   |

CI, confidence interval; HDAge, homeostatic dysregulation age; HR, hazard ratio; KDMAge, Klemera-Doubal method age; SD, standard deviation. All models were disease-specific models adjusted for the covariates listed in **Supplementary Table 1**.  $P_{interaction}$  represent p-values of the multiplicative interaction terms between the continuous biological age measures and the subgroup indicator.

**Supplementary Table 4.** Association between biological age measures and neurological disorders after excluding diagnoses within 5 years from baseline

| Model                                  | KDMAge residual             |                       | PhenoAge residual           |                       | HDAge                       |                       |
|----------------------------------------|-----------------------------|-----------------------|-----------------------------|-----------------------|-----------------------------|-----------------------|
|                                        | HR per SD increase (95% CI) | <i>p</i>              | HR per SD increase (95% CI) | <i>p</i>              | HR per SD increase (95% CI) | <i>p</i>              |
| <b>All-cause dementia</b>              |                             |                       |                             |                       |                             |                       |
| Age- & sex-adjusted model <sup>a</sup> | 1.25 (1.18, 1.33)*          | $1.5 \times 10^{-13}$ | 1.26 (1.19, 1.33)*          | $1.6 \times 10^{-14}$ | 1.17 (1.10, 1.26)*          | $2.8 \times 10^{-6}$  |
| Multivariable model <sup>b</sup>       | 1.25 (1.17, 1.33)*          | $6.2 \times 10^{-12}$ | 1.22 (1.15, 1.30)*          | $1.8 \times 10^{-10}$ | 1.17 (1.09, 1.25)*          | $1.4 \times 10^{-5}$  |
| Disease-specific model <sup>c</sup>    | 1.17 (1.09, 1.26)*          | $2.9 \times 10^{-5}$  | 1.17 (1.09, 1.26)*          | $1.9 \times 10^{-5}$  | 1.05 (0.97, 1.14)           | 0.26                  |
| <b>Alzheimer's disease</b>             |                             |                       |                             |                       |                             |                       |
| Age- & sex-adjusted model <sup>a</sup> | 1.11 (1.01, 1.23)           | 0.033                 | 1.17 (1.06, 1.29)*          | 0.001                 | 1.06 (0.95, 1.18)           | 0.326                 |
| Multivariable model <sup>b</sup>       | 1.12 (1.01, 1.24)           | 0.034                 | 1.15 (1.04, 1.27)*          | 0.008                 | 1.06 (0.95, 1.19)           | 0.292                 |
| Disease-specific model <sup>c</sup>    | 1.08 (0.96, 1.22)           | 0.209                 | 1.13 (1.00, 1.27)           | 0.042                 | 0.96 (0.84, 1.10)           | 0.591                 |
| <b>Vascular dementia</b>               |                             |                       |                             |                       |                             |                       |
| Age- & sex-adjusted model <sup>a</sup> | 1.66 (1.48, 1.86)*          | $1.5 \times 10^{-17}$ | 1.54 (1.38, 1.73)*          | $1.5 \times 10^{-13}$ | 1.46 (1.27, 1.68)*          | $1.3 \times 10^{-7}$  |
| Multivariable model <sup>b</sup>       | 1.61 (1.42, 1.82)*          | $6.1 \times 10^{-14}$ | 1.46 (1.29, 1.65)*          | $1.2 \times 10^{-9}$  | 1.40 (1.21, 1.62)*          | $6.0 \times 10^{-6}$  |
| Disease-specific model <sup>c</sup>    | 1.42 (1.22, 1.64)*          | $3.8 \times 10^{-6}$  | 1.29 (1.12, 1.50)*          | $5.5 \times 10^{-4}$  | 1.20 (1.00, 1.43)           | 0.044                 |
| <b>Ischemic stroke</b>                 |                             |                       |                             |                       |                             |                       |
| Age- & sex-adjusted model <sup>a</sup> | 1.49 (1.42, 1.56)*          | $1.8 \times 10^{-56}$ | 1.46 (1.40, 1.54)*          | $3.6 \times 10^{-57}$ | 1.31 (1.24, 1.38)*          | $9.5 \times 10^{-21}$ |
| Multivariable model <sup>b</sup>       | 1.44 (1.37, 1.52)*          | $4.6 \times 10^{-41}$ | 1.41 (1.34, 1.48)*          | $5.0 \times 10^{-40}$ | 1.25 (1.17, 1.32)*          | $3.0 \times 10^{-13}$ |
| Disease-specific model <sup>c</sup>    | 1.37 (1.28, 1.45)*          | $1.2 \times 10^{-22}$ | 1.35 (1.28, 1.43)*          | $5.5 \times 10^{-24}$ | 1.19 (1.11, 1.27)*          | $1.2 \times 10^{-6}$  |
| <b>Parkinson's disease</b>             |                             |                       |                             |                       |                             |                       |
| Age- & sex-adjusted model <sup>a</sup> | 1.01 (0.92, 1.11)           | 0.842                 | 0.98 (0.89, 1.07)           | 0.643                 | 0.92 (0.83, 1.02)           | 0.133                 |
| Multivariable model <sup>b</sup>       | 1.01 (0.92, 1.12)           | 0.819                 | 0.99 (0.90, 1.09)           | 0.800                 | 0.91 (0.81, 1.01)           | 0.075                 |
| Disease-specific model <sup>c</sup>    | 1.01 (0.91, 1.11)           | 0.920                 | 0.98 (0.89, 1.09)           | 0.738                 | 0.89 (0.79, 1.00)           | 0.047                 |
| <b>Motor neurone disease</b>           |                             |                       |                             |                       |                             |                       |
| Age- & sex-adjusted model <sup>a</sup> | 1.12 (0.93, 1.35)           | 0.223                 | 1.10 (0.92, 1.32)           | 0.301                 | 1.11 (0.92, 1.36)           | 0.281                 |
| Multivariable model <sup>b</sup>       | 1.11 (0.91, 1.35)           | 0.306                 | 1.07 (0.88, 1.30)           | 0.477                 | 1.11 (0.90, 1.36)           | 0.341                 |
| Disease-specific model <sup>c</sup>    | 1.11 (0.91, 1.35)           | 0.304                 | 1.07 (0.88, 1.30)           | 0.475                 | 1.11 (0.90, 1.36)           | 0.339                 |

CI, confidence interval; HDAge, homeostatic dysregulation age; HR, hazard ratio; KDMAge, Klemmera-Doubal method age; SD, standard deviation.

<sup>d</sup> Age- & sex-adjusted models: adjusted for age (timescale), birthyear, and sex (n=325,459).

<sup>e</sup> Multivariable models: additionally adjusted for baseline assessment centre, ethnicity, body mass index, smoking, alcohol consumption, and deprivation (n=325,459).

<sup>f</sup> Disease-specific models further included covariates that are relevant for each outcome based on the literature (**Supplementary Table 1**). The models for all-cause dementia, Alzheimer's disease, and vascular dementia included education, physical activity, social isolation, air pollution, diabetes, hypertension, depressive symptoms, hearing impairment, traumatic brain injury, *ApoE* e4 allele, and family history of dementia (n=269,000). The models for ischaemic stroke included physical activity, air pollution, fresh vegetable and fruit intake, red meat intake, processed meat intake, diabetes, hypertension, depressive symptoms, dyslipidaemia, atrial fibrillation, and family history of stroke (n=279,344). The models for Parkinson's disease included hypertension, depressive symptoms, traumatic brain injury, and family history of Parkinson's disease (n=325,644). The models for motor neurone disease included family history of dementia (n=325,777).

\* Significant at a false discovery rate corrected significance level of 0.025
